# Supplementary material for: Rapid preparation of N,B-codoped carbon quantum dot based films with strong two-photon absorption and optical limiting effect
Source: Royal Society of Chemistry journal article supplement (doi:10.1039/d2tc05106k), 2023-01-01
Supplement: d2tc05106k1.pdf [file d2tc05106k1.pdf]

## Supporting Information

### **Rapid preparation of N,B-codoped carbon quantum dot based films with strong two-photon absorption and optical limiting effect**

Jingxia Zheng<sup>a, b\*</sup>, Zheyong Cao<sup>a</sup>, Mingxiu Lei<sup>a</sup>, Zhongquan Nie<sup>c</sup>, Yongzhen Yang<sup>a, b\*</sup>,  
Xuguang Liu<sup>b, d\*</sup>, Bingshe Xu<sup>a, b</sup>

<sup>a</sup>*Key Laboratory of Interface Science and Engineering in Advanced Materials, Ministry of Education, Taiyuan University of Technology, Taiyuan 030024, China*

<sup>b</sup>*Shanxi-Zheda Institute of Advanced Materials and Chemical Engineering, Taiyuan 030032, China*

<sup>c</sup>*College of Optoelectronics, Taiyuan University of Technology, Taiyuan 030024, China*

<sup>d</sup>*College of Materials Science and Engineering, Taiyuan University of Technology, Taiyuan 030024, China*

Corresponding author: Tel: +86-0351-6010311. E-mail: zhengjingxia@tyut.edu.cn (Jingxia Zheng); yzytyut@126.com (Yongzhen Yang); liuxuguang@tyut.edu.cn (Xuguang Liu).

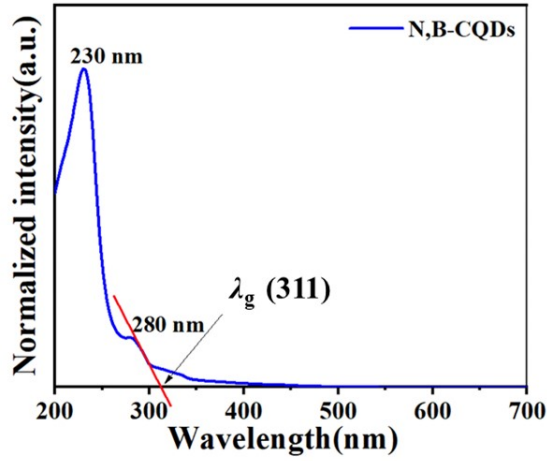

Fig. S1 UV-vis spectrum of N,B-CQDs

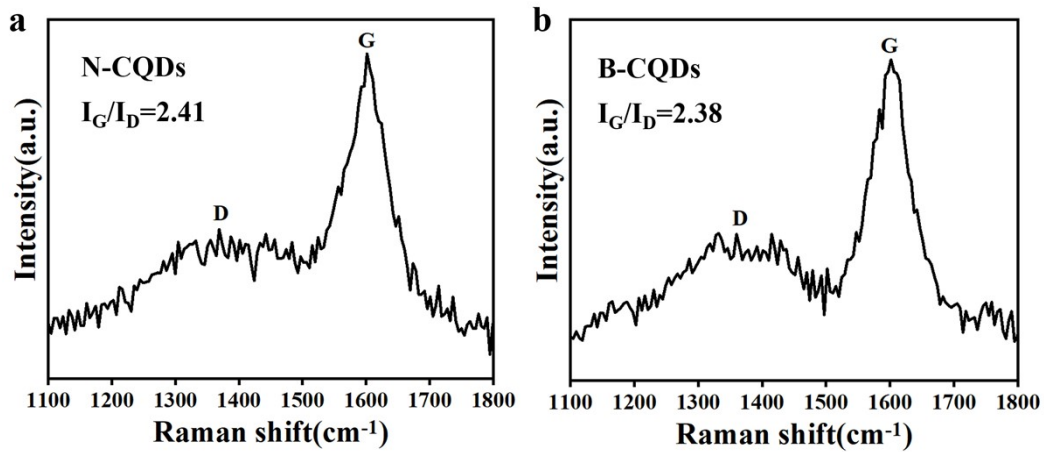

Fig. S2 Raman spectra of N-CQDs and B-CQDs

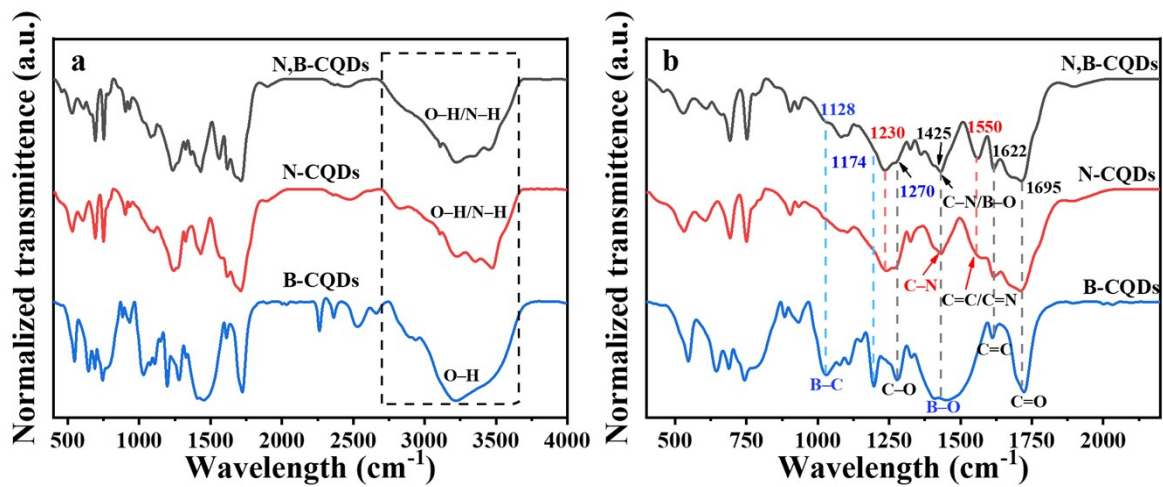

Fig. S3 FTIR spectra of (a) N,B-CQDs, N-CQDs, and B-CQDs, and (b) their 500–2000  $\text{cm}^{-1}$  range

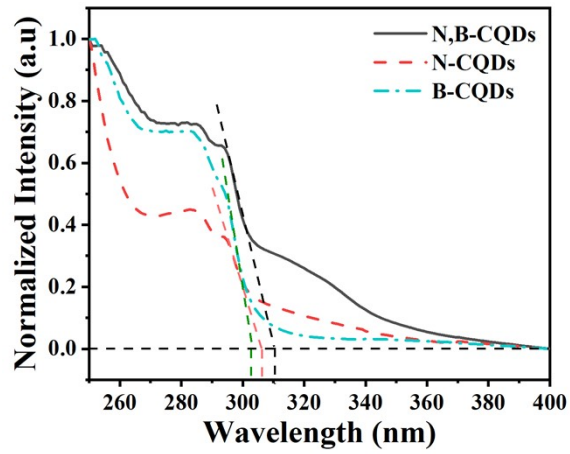

Fig. S4 UV-Vis spectra of N,B-CQDs, N-CQDs, and B-CQDs

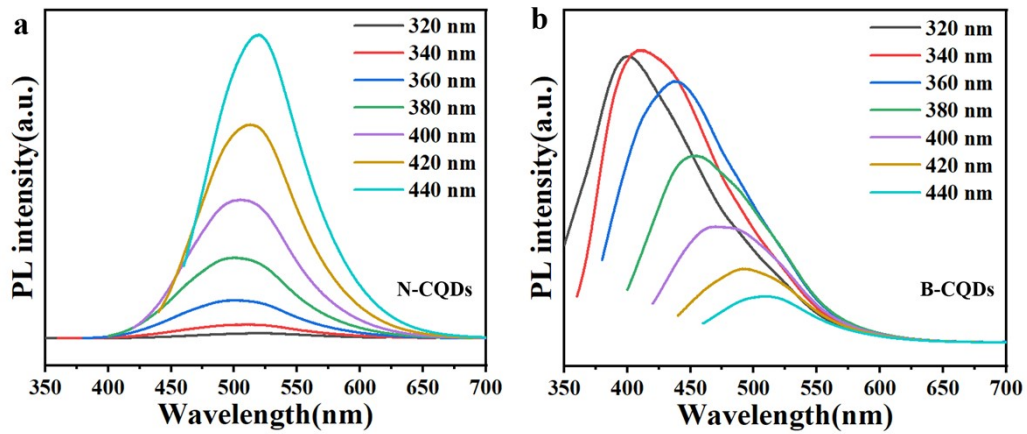

Fig. S5 PL spectra of (a) N-CQDs and (b) B-CQDs

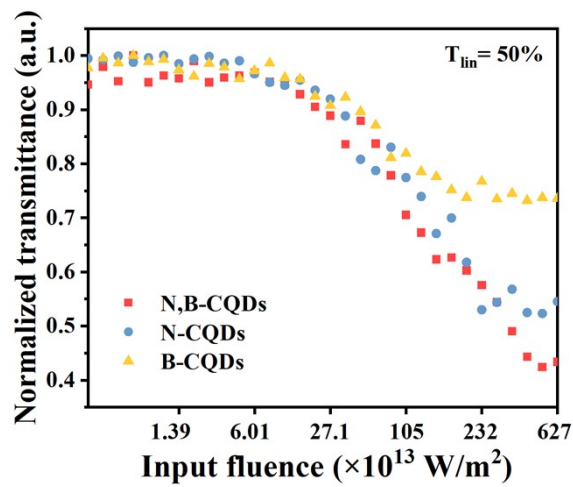

Fig. S6 Optical limiting curves of N,B-CQD, N-CQD, and B-CQD solutions

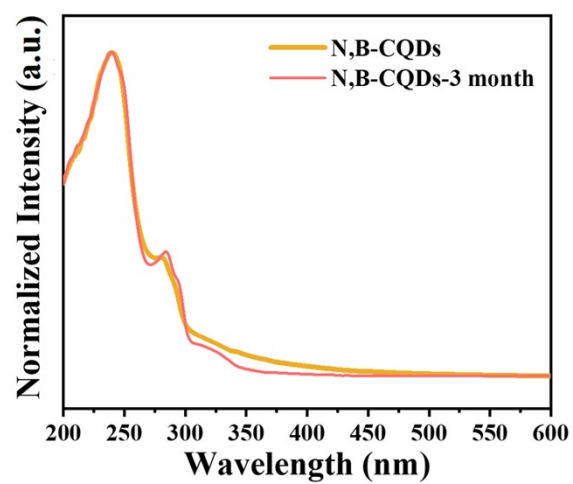

Fig.S7 UV-vis spectra of N,B-CQDs kept for three months

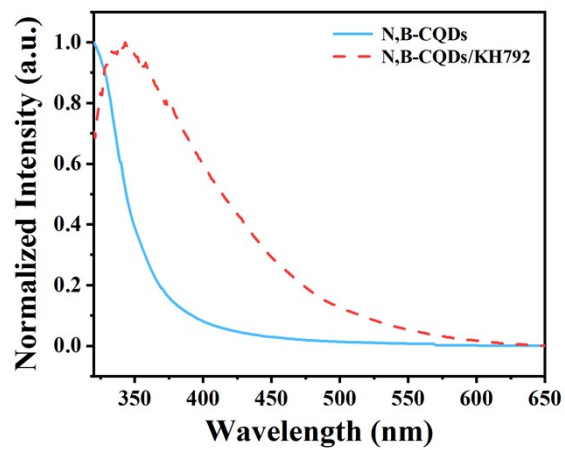

Fig.S8 UV-vis spectra of N,B-CQDs solution and N,B-CQDs/KH792 film at 320–650

nm
